# Supplementary material for: Genome-Wide Association Study of Motor Coordination
Source: Front Hum Neurosci. 2021 Jun 9;15:669902. doi: 10.3389/fnhum.2021.669902 (PMC8219980; doi:10.3389/fnhum.2021.669902)
Supplement: Supplementary Table 1 — Full list of association results for the 59 SNPs that met the threshold for suggestive association (P ≤ 5 × 10–5) on the SumQMS4. The statistical significance for each of the 59 SNPs is also reported for the binary DCD case/control association test. [file Table_1.XLSX]

## Sheet: Sheet1
						SumQMS4							pDCD Case/Control
CHR	SNP	BP	A1	A2		NMISS	BETA	SE	R2	T	P		F_A	F_U	CHISQ	P	OR
3	rs11128630	13076226	T	G		4367	-0.8176	0.1832	0.00454	-4.462	8.335e-06		0.1786	0.2084	2.03	0.1542	0.826
3	rs11718914	13077146	C	T		4408	-0.8056	0.1796	0.004544	-4.485	7.493e-06		0.1801	0.2146	2.681	0.1015	0.804
3	rs74653607	13078933	T	C		4403	-0.826	0.1803	0.004748	-4.582	4.734e-06		0.1801	0.2131	2.473	0.1158	0.8109
3	rs11929559	13079226	C	T		4359	-0.8162	0.1825	0.004572	-4.474	7.887e-06		0.1715	0.2075	2.937	0.08655	0.7908
3	rs11925501	13079235	T	C		4367	-0.8125	0.1825	0.004521	-4.452	8.712e-06		0.1715	0.207	2.862	0.0907	0.7932
3	rs9841637	13080739	A	G		4415	-0.815	0.179	0.004678	-4.554	5.398e-06		0.1816	0.217	2.808	0.09381	0.8009
3	rs9841967	13080976	A	G		4421	-0.8098	0.1789	0.004616	-4.527	6.139e-06		0.1816	0.2166	2.751	0.09722	0.8027
3	rs79122486	13085290	A	C		4323	-1.04	0.23	0.00471	-4.522	6.29e-06		0.09662	0.1248	2.743	0.09771	0.7497
3	rs112216455	13087276	A	C		4520	-0.7938	0.1754	0.004513	-4.526	6.175e-06		0.1808	0.2175	3.052	0.08065	0.7937
3	rs74782020	13087667	T	C		4330	-1.033	0.2291	0.004679	-4.51	6.64e-06		0.09662	0.1248	2.729	0.09852	0.7502
3	rs12498047	13088407	G	C		4523	-0.7998	0.1752	0.004589	-4.565	5.123e-06		0.1808	0.2177	3.077	0.07938	0.793
3	rs17775620	13089039	A	G		4520	-0.8038	0.1754	0.004626	-4.582	4.72e-06		0.1808	0.2177	3.077	0.07938	0.793
3	rs75528281	13089158	T	C		4520	-0.8038	0.1754	0.004626	-4.582	4.72e-06		0.1808	0.2177	3.077	0.07938	0.793
3	rs9815898	13091428	C	T		4542	-0.8142	0.1743	0.004785	-4.672	3.068e-06		0.1799	0.2193	3.511	0.06095	0.7808
3	rs75150723	13096390	C	T		4468	-0.8103	0.1771	0.004665	-4.575	4.887e-06		0.1777	0.216	3.296	0.06944	0.7845
3	rs62232913	13114852	A	C		4470	-0.7569	0.1691	0.004465	-4.477	7.77e-06		0.2066	0.2449	3.044	0.08101	0.8028
4	rs17034349	157215618	C	A		4528	1.309	0.2926	0.004401	4.473	7.901e-06		0.07746	0.05575	3.268	0.07066	1.422
5	rs75575712	110555735	T	C		4522	1.19	0.2662	0.004399	4.469	8.045e-06		0.1051	0.06887	7.418	0.006457	1.589
6	rs9395876	53632969	C	T		4478	0.7663	0.1728	0.004375	4.435	9.434e-06		0.2119	0.1974	0.4956	0.4814	1.093
6	rs10755766	53637193	G	A		4478	0.7663	0.1728	0.004375	4.435	9.434e-06		0.2119	0.1974	0.4956	0.4814	1.093
6	rs9349681	53640616	T	G		4478	0.7663	0.1728	0.004375	4.435	9.434e-06		0.2119	0.1974	0.4956	0.4814	1.093
6	rs146966633	53642048	T	A		4478	0.7663	0.1728	0.004375	4.435	9.434e-06		0.2119	0.1974	0.4956	0.4814	1.093
6	rs9382232	53646210	G	C		4478	0.7663	0.1728	0.004375	4.435	9.434e-06		0.2119	0.1974	0.4956	0.4814	1.093
6	rs9382233	53646837	T	C		4478	0.7663	0.1728	0.004375	4.435	9.434e-06		0.2119	0.1974	0.4956	0.4814	1.093
6	rs9382235	53653635	T	C		4441	0.7731	0.1741	0.004423	4.441	9.17e-06		0.2126	0.1961	0.6275	0.4283	1.106
6	rs4610551	53654299	T	C		4441	0.7731	0.1741	0.004423	4.441	9.17e-06		0.2126	0.1961	0.6275	0.4283	1.106
14	rs8012142	70875943	G	A		4541	-1.071	0.2355	0.004533	-4.546	5.598e-06		0.07243	0.11	5.671	0.01725	0.632
14	rs17108107	70877771	T	C		4541	-1.065	0.2363	0.004455	-4.507	6.737e-06		0.07009	0.1091	6.178	0.01294	0.6155
14	rs7159587	70880093	T	C		4538	-1.078	0.2335	0.004679	-4.618	3.985e-06		0.07243	0.1118	6.144	0.01319	0.6207
14	rs77354632	70881902	T	A		4541	-1.057	0.2354	0.004423	-4.491	7.272e-06		0.07243	0.1097	5.612	0.01783	0.6335
14	rs7150428	70882129	A	G		4537	-1.052	0.2371	0.004325	-4.439	9.273e-06		0.07009	0.1086	6.039	0.01399	0.6188
14	rs4902817	70887798	G	T		4536	-1.054	0.237	0.004343	-4.447	8.904e-06		0.07243	0.1089	5.406	0.02007	0.6387
14	rs12586722	70890140	A	G		4538	-1.081	0.237	0.004563	-4.56	5.257e-06		0.07243	0.1092	5.464	0.01941	0.6373
14	rs8008210	70890188	G	A		4536	-1.115	0.2336	0.004998	-4.772	1.88e-06		0.07243	0.1123	6.299	0.01208	0.6171
14	rs77867352	70894621	A	G		4538	-1.076	0.2379	0.004489	-4.522	6.27e-06		0.07009	0.1083	5.962	0.01462	0.6207
14	rs80045026	70895083	T	C		4538	-1.059	0.2372	0.00437	-4.462	8.308e-06		0.07243	0.1086	5.317	0.02112	0.641
14	rs4340265	70900375	A	G		4538	-1.076	0.2379	0.004489	-4.522	6.27e-06		0.07009	0.1083	5.962	0.01462	0.6207
14	rs4550388	70900822	T	C		4538	-1.08	0.2367	0.004569	-4.563	5.177e-06		0.07243	0.1092	5.464	0.01941	0.6373
14	rs12586481	70902288	T	C		4538	-1.08	0.2367	0.004569	-4.563	5.177e-06		0.07243	0.1092	5.464	0.01941	0.6373
14	rs75971975	70902998	G	A		4538	-1.081	0.237	0.004563	-4.56	5.257e-06		0.07243	0.1092	5.464	0.01941	0.6373
14	rs2332382	70904145	G	A		4538	-1.059	0.2372	0.00437	-4.462	8.308e-06		0.07243	0.1086	5.317	0.02112	0.641
14	rs12436808	70904607	C	T		4538	-1.081	0.237	0.004563	-4.56	5.257e-06		0.07243	0.1092	5.464	0.01941	0.6373
14	rs73291944	70905316	G	A		4538	-1.081	0.237	0.004563	-4.56	5.257e-06		0.07243	0.1092	5.464	0.01941	0.6373
14	rs8020009	70908281	A	C		4538	-1.058	0.2369	0.004377	-4.466	8.18e-06		0.07243	0.1086	5.317	0.02112	0.641
14	rs7161249	70910364	G	T		4538	-1.081	0.237	0.004563	-4.56	5.257e-06		0.07243	0.1092	5.464	0.01941	0.6373
14	rs12436464	70916401	A	T		4538	-1.076	0.2379	0.004489	-4.522	6.27e-06		0.07009	0.1083	5.962	0.01462	0.6207
14	rs3764182	70919161	A	C		4542	-1.072	0.2367	0.004498	-4.529	6.076e-06		0.07243	0.1091	5.448	0.01959	0.6377
14	rs73291972	70919530	A	T		4542	-1.072	0.2367	0.004498	-4.529	6.076e-06		0.07243	0.1091	5.448	0.01959	0.6377
14	rs8014252	70919699	C	T		4542	-1.05	0.2369	0.004307	-4.432	9.571e-06		0.07243	0.1085	5.301	0.02131	0.6415
14	rs78093131	70921382	C	A		4518	-1.08	0.2365	0.004595	-4.566	5.107e-06		0.07042	0.1103	6.37	0.01161	0.611
14	rs3751523	70924462	A	G		4535	-1.083	0.2349	0.004668	-4.611	4.126e-06		0.07243	0.1112	6.007	0.01425	0.6239
14	rs12436902	70929096	C	T		4527	-1.061	0.2396	0.004317	-4.429	9.683e-06		0.06808	0.1066	6.139	0.01323	0.6119
14	rs8015163	70930562	G	C		4530	-1.062	0.2395	0.004326	-4.435	9.404e-06		0.06776	0.1065	6.236	0.01252	0.6096
14	rs17107997	70932765	C	T		4541	-1.06	0.2393	0.004309	-4.432	9.553e-06		0.07009	0.1051	5.138	0.02341	0.6416
14	rs73293909	70933850	C	T		4542	-1.059	0.2393	0.004296	-4.426	9.83e-06		0.07009	0.1051	5.123	0.02362	0.642
14	rs7154884	70934095	T	C		4542	-1.059	0.2393	0.004296	-4.426	9.83e-06		0.07009	0.1051	5.123	0.02362	0.642
14	rs2293877	70935875	G	A		4542	-1.059	0.2393	0.004296	-4.426	9.83e-06		0.07009	0.1051	5.123	0.02362	0.642
15	rs12324426	100783527	G	A		4469	0.7402	0.166	0.004429	4.458	8.476e-06		0.2559	0.2159	3.5	0.06136	1.249
20	rs2904292	51577026	G	C		4539	-0.834	0.1863	0.004397	-4.476	7.784e-06		0.1495	0.1921	4.535	0.03321	0.7394
